# Supplementary material
Source: PubMed Central journal article supplement (PMC2773102)
Supplement: pp.109.144709_1.pdf [file pp.109.144709_1.pdf]

**Fig. S1****Partial duplex DNA substrates**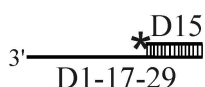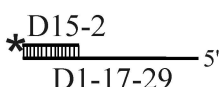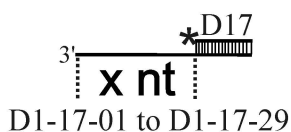

similar to  
Shen et al., 1998

**M13-DNA based substrate**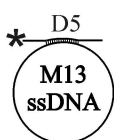

Kobbe et al., 2008

**Holliday Junction substrates**

X12-HJ-1\*

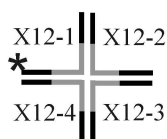

e.g. Mohaghegh et al., 2001

X0-HJ-1\*

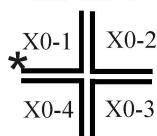

e.g. Boddy et al., 2001;  
Gaillard et al., 2003

nX0-1\*

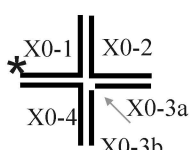

nX0-2\*

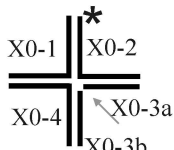

nX0-3a\*

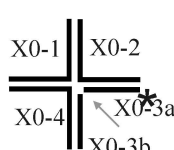

nX0-3b\*

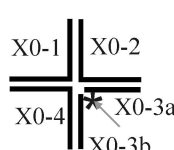

nX0-4\*

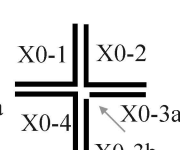**Replication fork substrate**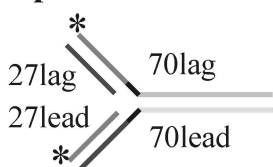

e.g. Machwe et al., 2006

**Annealing substrate**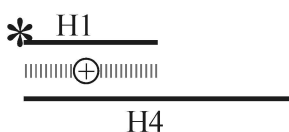

e.g. Van Komen et al., 2003

**Fig. S1. Structure of the DNA substrates used in this study**

The composing oligonucleotides of the different DNA structures are indicated. Sequences are given in Table SI.

**Fig. S2**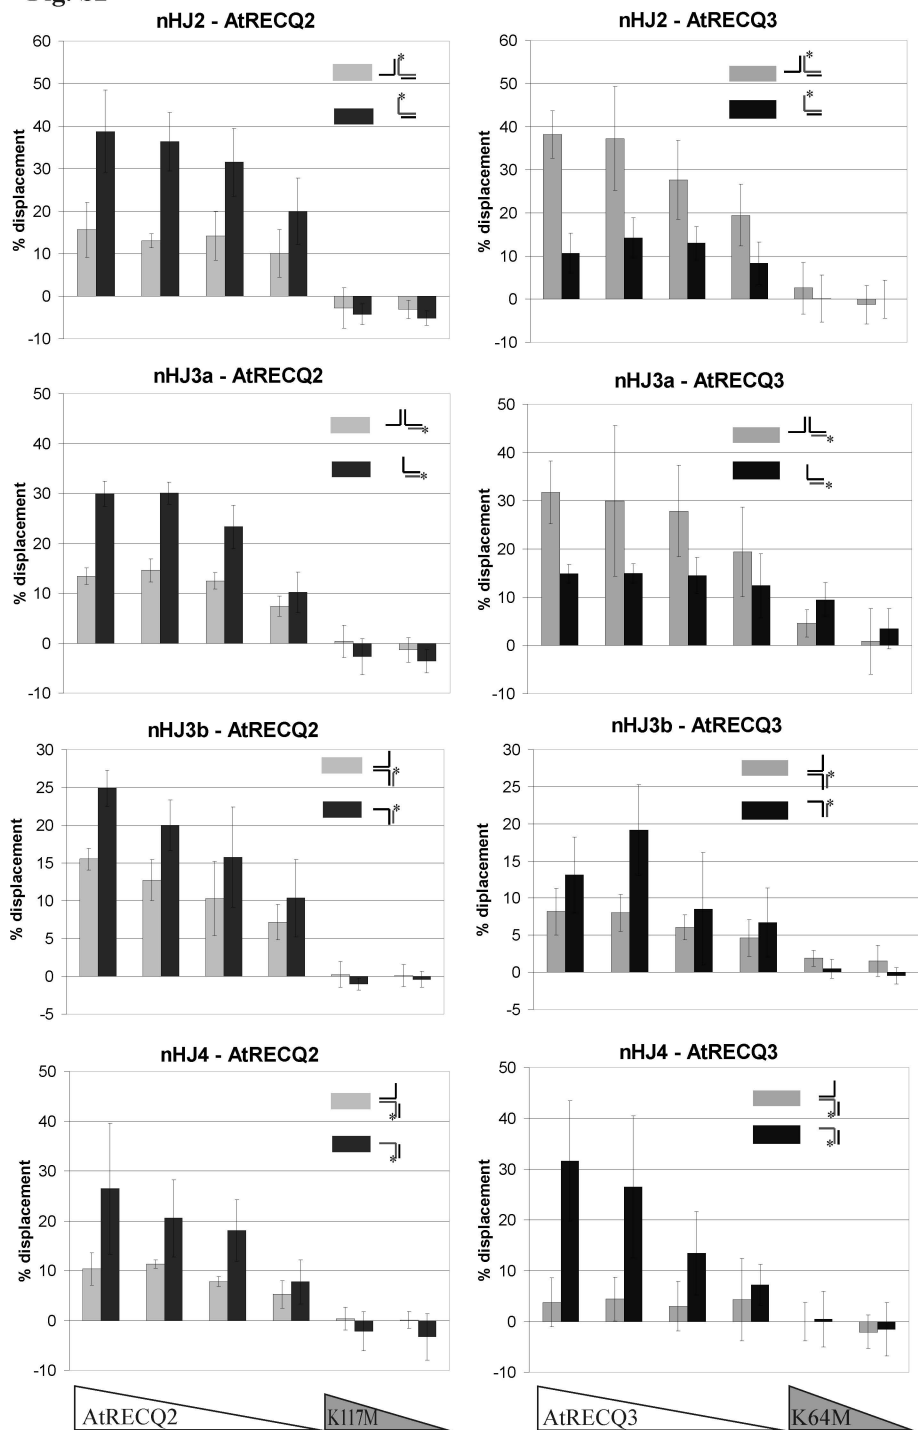**Fig. S2. Concentration dependency of processing of the nX0 Holliday junction.**

The differently labeled nX0 junction was incubated with decreasing concentrations of AtRECQ2 and AtRECQ3 (8 nM, 5 nM, 4 nM, 2.5 nM), AtRECQ2-K117M (5 nM, 4nM), and AtRECQ3-K64M (8 nM, 5 nM) for 30 min in the presence of 1.35 mM MgCl<sub>2</sub>. The main products were quantified from at least three experiments, and the means and the standard deviations are given.

**Table S1. Sequences of the oligonucleotides used for the preparation of the DNA substrates**

| <b>Name</b> | <b>Sequence</b>                                                                     |
|-------------|-------------------------------------------------------------------------------------|
| D1-17-29    | 5'-GC GCG GAA GCT TGG CTG CAGAA TATTG CTAGC GGGAA TTCGG CGCG                        |
| D1-17-21    | 5'-GC GCG GAA GCT TGG CTG CAGAA TATTG CTAGC GGGAA T                                 |
| D1-17-16    | 5'-GC GCG GAA GCT TGG CTG CAGAA TATTG CTAGC G                                       |
| D1-17-12    | 5'-GC GCG GAA GCT TGG CTG CAGAA TATTG CT                                            |
| D1-17-09    | 5'-GC GCG GAA GCT TGG CTG CAGAA TATT                                                |
| D1-17-06    | 5'-GC GCG GAA GCT TGG CTG CAGAA T                                                   |
| D1-17-03    | 5'-GC GCG GAA GCT TGG CTG CAG                                                       |
| D1-17-01    | 5'-GC GCG GAA GCT TGG CTG C                                                         |
| D15         | 5'-G CCA AGC TTC CGC GC                                                             |
| D15-2       | 5'-CGCG CCGAA TTCCC G                                                               |
| D17         | 5'-CAG CCA AGC TTC CGC GC                                                           |
| D5          | 5'-AAAAAAAAA GTCGACTCTAGAGGATC AAAAAAAAAA                                           |
| X12-1       | 5'-GACGC TGCCG AATTC TGGCT <b>TGCTA</b> GGACA TCTTT GCCCA CGTTG ACCCG               |
| X12-2       | 5'-CGGGT CAACG TGGGC AAAGA TGTCC <b>TAGCA</b> ATGTA ATCGT CTATG ACGTC               |
| X12-3       | 5'-GACGT CATAG ACGAT TACAT <b>TGCTA</b> GGACA TGCTG TCTAG AGACT ATCGC               |
| X12-4       | 5'-GCGAT AGTCT CTAGA CAGCA TGTCC <b>TAGCA</b> AGCCA GAATT CGGCA GCGTC               |
| nX0-1       | 5'-GAA CGT CAT AGA CGA TTA CAT TGC TAC ATG GAG CTG TCT AGA GGA TCC GA               |
| nX0-2       | 5'-GTC GGA TCC TCT AGA CAG CTC CAT GAT CAC TGG CAC TGG TAG AAT TCG GC               |
| nX0-3       | 5'-TGC CGA ATT CTA CCA GTG CCA GTG ATG GAC ATC TTT GCC CAC GTT GAC CC               |
| nX0-4       | 5'-TGG GTC AAC GTG GGC AAA GAT GTC CTA GCA ATG TAA TCG TCT ATG ACG TT               |
| nX0-3a      | 5'-TGC CGA ATT CTA CCA GTG CCA GTG AT                                               |
| nX0-3b      | 5'-GGA CAT CTT TGC CCA CGT TGA CCC                                                  |
| 70lag       | 5'-GCTATCGTACATGATATCCTCACACTCTGAATAGCCGAATTCTTAGGGTTAGGGTTAACATCAAGTCACG           |
| 27lag       | 5'-GAGTGTGAGGATATCATGTACGATAGC                                                      |
| 70lead      | 5'-CGTGACTTGATGTTAACCCTAACCCTAAGAATTCGGCTTAAAGTGAGTGTGAGGATATCATGTACGATAGC          |
| 27lead      | 5'-GCTATCGTACATGATATCCTCACACTC                                                      |
| S-40a       | 5'-ATTAAGCTCTAAGCCATGAATTCAAATGACCTCTTATCAA                                         |
| S-40b-5     | 5'-ATGTCACTATTGAAGCGCTGATCACTGTCTCCATCGAACGTTGATAAGAGGTCATTTGAATTCATGGCTTAGAGCTTAAT |
